# Supplementary material for: Perceptual Other-Race Training Reduces Implicit Racial Bias
Source: PubMed Central journal article supplement (PMC2627769; doi:10.1371/journal.pone.0004215), 2009-01-21
Supplement: pone.0004215.s001.pdf [file pone.0004215.s001.pdf]

### Background Questionnaire

- 1. How old are you? \_\_\_\_\_
- 2. What is your ethnicity? (Please circle one)
  - African                                          Chinese
  - Hispanic                                         East Indian
  - Caucasian                                      Other (please specify) \_\_\_\_\_
- 3. In which country were you born? \_\_\_\_\_
- 4. Have you ever lived in a country other than your place of birth? Please circle Y / N  
If yes, please list:

| Country | Length of time (approximately) |
|---------|--------------------------------|
| _____   | _____                          |
| _____   | _____                          |
| _____   | _____                          |
| _____   | _____                          |
- 5. Where was your mother born? \_\_\_\_\_
- 6. What is her ethnicity? \_\_\_\_\_
- 7. Where was your father born? \_\_\_\_\_
- 8. What is his ethnicity? \_\_\_\_\_
- 9. Do you have any relatives (by birth or marriage) or close friends who are members of other ethnic or racial groups? Please circle Y / N  
If yes, please list:

| Their ethnicity | Relationship to you | How often you see them (circle one) |
|-----------------|---------------------|-------------------------------------|
| _____           | _____               | Daily   Weekly   Yearly   <Yearly   |
| _____           | _____               | Daily   Weekly   Yearly   <Yearly   |
| _____           | _____               | Daily   Weekly   Yearly   <Yearly   |
| _____           | _____               | Daily   Weekly   Yearly   <Yearly   |
- 10. Have you ever lived with people from other ethnic groups? Please circle Y / N  
If yes, please list:

| Their ethnicity | Length of cohabitation | Your age when you moved in |
|-----------------|------------------------|----------------------------|
| _____           | _____                  | _____                      |
| _____           | _____                  | _____                      |
| _____           | _____                  | _____                      |
| _____           | _____                  | _____                      |

THANK YOU FOR YOUR PARTICIPATION!
